# Supplementary material for: Surface oxygen vacancy engineering in weak Bi–O bonded ferroelectric bismuth sodium titanate for boosting the photocatalytic CO2 reduction reaction
Source: Royal Society of Chemistry journal article supplement (doi:10.1039/d4ta01030b), 2024-01-01
Supplement: d4ta01030b1.pdf [file d4ta01030b1.pdf]

Electronic supplementary information

# Surface oxygen vacancy engineering in weak Bi–O bonded ferroelectric bismuth sodium titanate for boosting the photocatalytic CO<sub>2</sub> reduction reaction

Xiao Liu,<sup>\*a</sup> Jicong Wang,<sup>a</sup> Fangyuan Zhu,<sup>b</sup> Yanrui Li,<sup>a</sup> Wenchao Tian,<sup>c</sup> Weijia Wang,<sup>d</sup> Ruiyun Guo,<sup>a</sup> Laijun Liu<sup>e</sup> and Jing Shi<sup>\*c</sup>

<sup>a</sup> School of Materials Science and Engineering, Xi'an University of Science and Technology, Xi'an 710054, China

<sup>b</sup> Shanghai Synchrotron Radiation Facility, Shanghai Advanced Research Institute, Chinese Academy of Sciences, Shanghai 201204, China

<sup>c</sup> State Key Laboratory of Electromechanical Integrated Manufacturing of High-Performance Electronic Equipments, School of Mechano-Electronic Engineering, Xidian University, Xi'an 710071, China

<sup>d</sup> State Key Laboratory of Solidification Processing, School of Materials Science and Engineering, Northwestern Polytechnical University, Xi'an 710072, China

<sup>e</sup> Key Laboratory of New Processing Technology for Nonferrous Metal & Materials (MOE), College of Materials Science and Engineering, Guilin University of Technology, Guilin 541006, China

\*Correspondence author. E-mail address: liuxiao@xust.edu.cn (X. Liu), jshi@xidian.edu.cn (J. Shi)

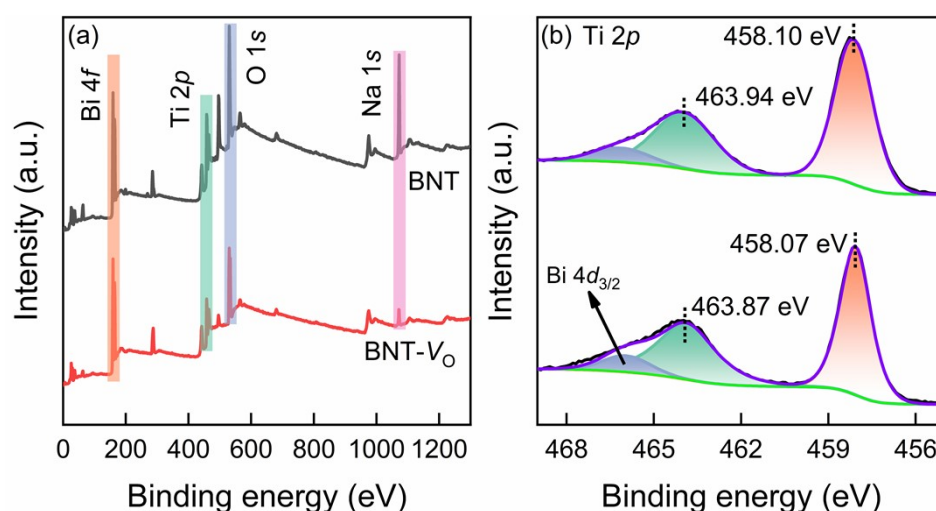

Fig. S1 (a) XPS spectra containing the four constituent elements survey scan. (b) Ti 2p XPS spectra.

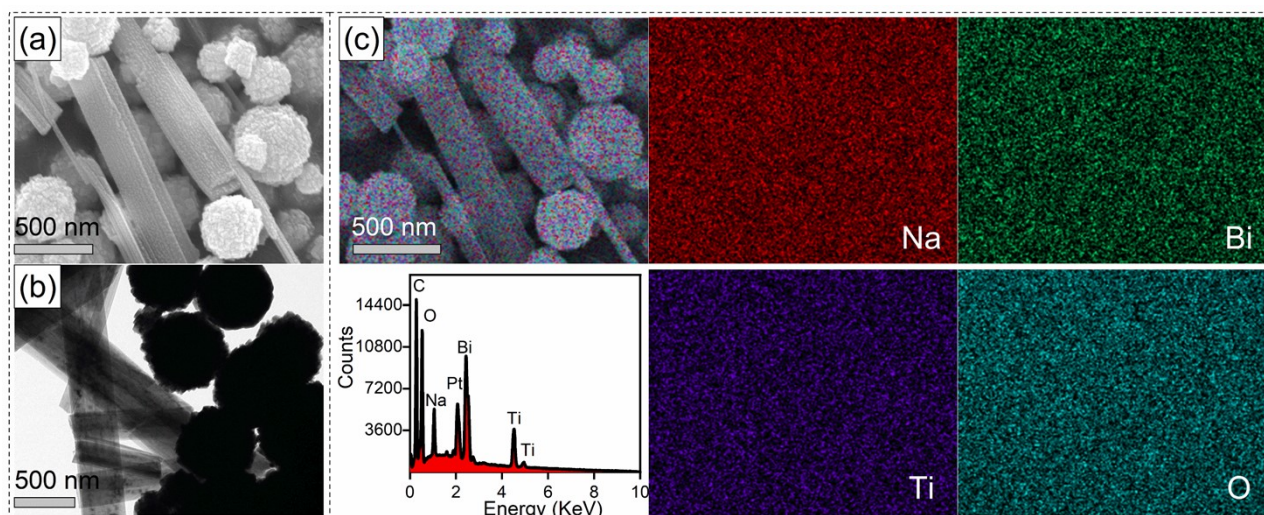

Fig. S2 (a) FE-SEM, (b) TEM and (c) EDS mapping of BNT.

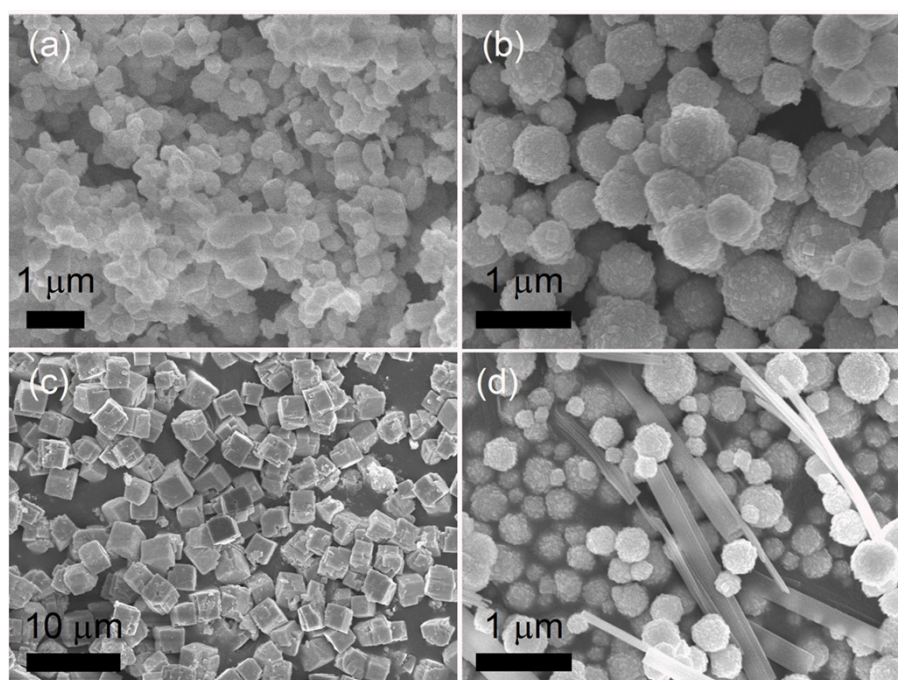

Fig. S3 SEM of different morphologies of BNTs: (a) Bulk, (b) Sphere, (c) Cube and (d) BNT.

The formation mechanism of BNT-based nanostructures with different morphologies, is influenced by the concentration of the mineralizer.  $C_{16}H_{36}O_4Ti$  and  $Bi(NO_3)_3 \cdot 5H_2O$  undergo hydrolyzed to form  $TiO_2 \cdot nH_2O$  and  $Bi_2O_3 \cdot nH_2O$ , which are further dissolved into  $Ti^{4+}$  and  $Bi^{3+}$ . NaOH was directly dissolved into  $Na^+$  and  $OH^-$ . The solubility of  $TiO_2 \cdot nH_2O$  is lower than that of  $Bi_2O_3 \cdot nH_2O$ , resulting in slow dissolution crystallization. When the NaOH concentration is low, the pre-dissolved  $Ti^{4+}$ ,  $Bi^{3+}$ ,  $Na^+$  and  $OH^-$  ions are adsorbed onto the  $TiO_2 \cdot nH_2O$  particles, forming nucleated clusters to reduce the surface energy and eventually grow into nanospheres with a stepped

surface. At relatively high concentrations of mineralizer, some hydrolyzed  $\text{TiO}_2 \cdot n\text{H}_2\text{O}$  nanoparticles underwent Ostwald ripening, transforming into small  $\text{TiO}_2$  nano-cubes. Subsequently, adjacent small cubes self-assembled along the same crystal orientation to form  $\text{TiO}_2$  nanowires. Meanwhile,  $\text{Bi}^{3+}$  ions and  $\text{Bi}_2\text{O}_3$  molecules were adsorbed on the surface, reducing their surface energy. The  $\text{TiO}_2$  nanowires served as a template for in-situ conversion into nanobelts. However, higher  $\text{NaOH}$  concentration and processing temperatures favored the formation of homogeneous cubes in the hydrothermal reaction.

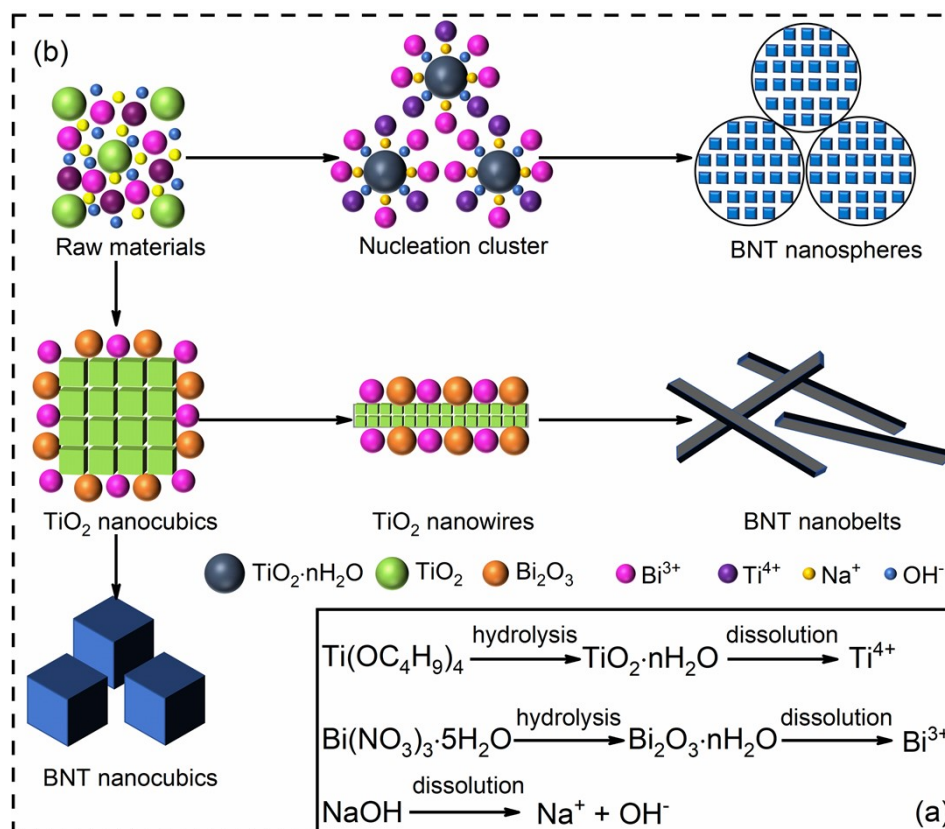

Fig. S4 Schematic of the formation mechanisms for BNT-based nanoparticles and nanobelts.

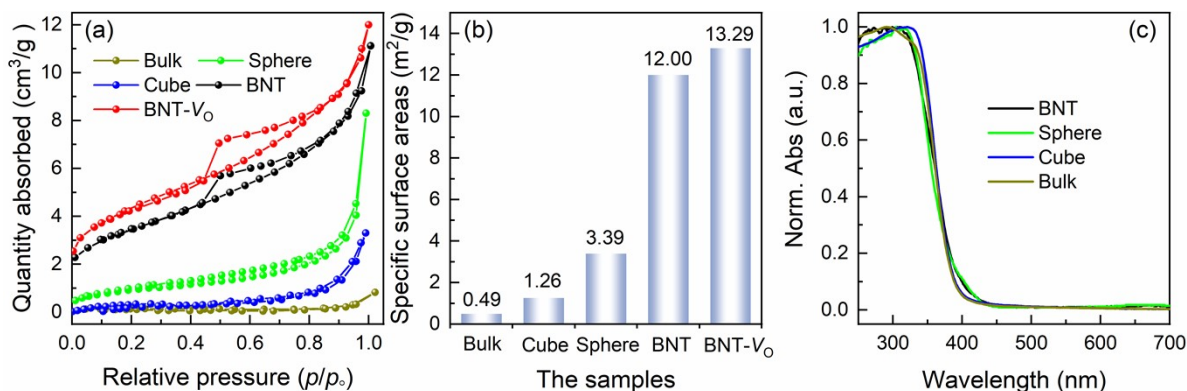

Fig. S5 (a) N<sub>2</sub> adsorption isotherm and (b) corresponding specific surface area of Bulk, Sphere, Cube, BNT and BNT- $V_0$ . (c) UV-vis spectra of Bulk, Sphere, Cube and BNT.

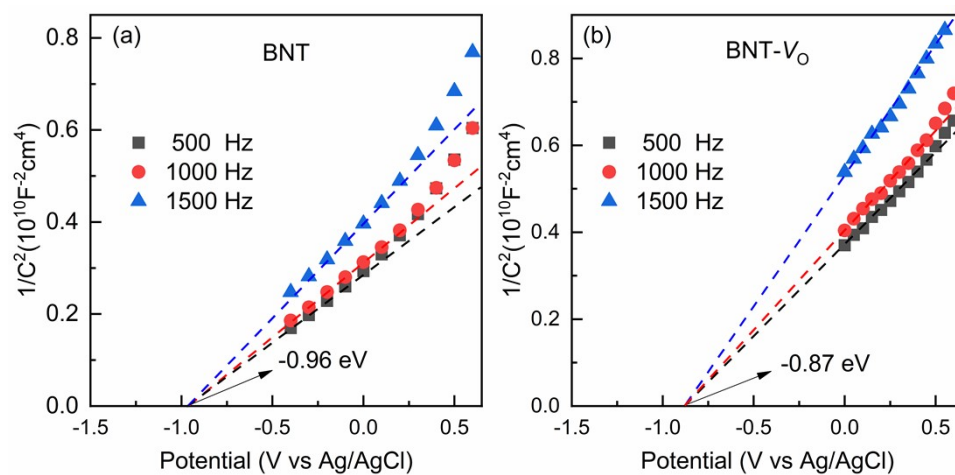

Fig. S6 Mott-Schottky plots of (a) BNT and (b) BNT- $V_O$  at frequencies of 500 Hz, 1000 Hz and 1500 Hz.
